# Supplementary material
Source: publisher figshare collection journal article supplement (https://acs.figshare.com/ndownloader/files/3785341)
Supplement: Supplementary file 1 [file 3785341]

## Supporting Information

Hydroxylated Mesoporous Nanosilica Coated by Polyethyleneimine  
Coupled with Gadolinium and Folic Acid: A Tumor-Targeted T<sub>1</sub> Magnetic  
Resonance Contrast Agent and Drug Delivery System

Guilong Zhang,<sup>||,†,‡</sup> Junlan Gao,<sup>||,§</sup> Junchao Qian,<sup>#</sup> Lele Zhang,<sup>§</sup> Kang Zheng,<sup>¶</sup> Kai Zhong,<sup>#</sup>  
Dongqing Cai,<sup>†</sup> Xin Zhang,<sup>\*,§</sup> and Zhengyan Wu<sup>\*,†</sup>

<sup>†</sup>Key Laboratory of Ion Beam Bioengineering, Hefei Institutes of Physical Science, Chinese Academy of Sciences and Anhui Province, Hefei, Anhui 230031, People's Republic of China

<sup>‡</sup>University of Science and Technology of China, Hefei 230026, People's Republic of China

<sup>§</sup>School of Life Sciences, Anhui Agricultural University, Hefei 230036, People's Republic of China

<sup>#</sup>High Magnetic Field Laboratory, Hefei Institutes of Physical Science, Chinese Academy of Sciences, Hefei 230031, People's Republic of China

<sup>¶</sup>Key Laboratory of Materials Physics, Institute of Solid State Physics, Chinese Academy of Sciences, Hefei 230031, People's Republic of China

\*To whom correspondence should be addressed. E-mail address: zywu@ipp.ac.cn (Z.W.);  
xinzhang@ahau.edu.cn (X.Z.), tel.: +86-551-65591413; +86-551-65786021.

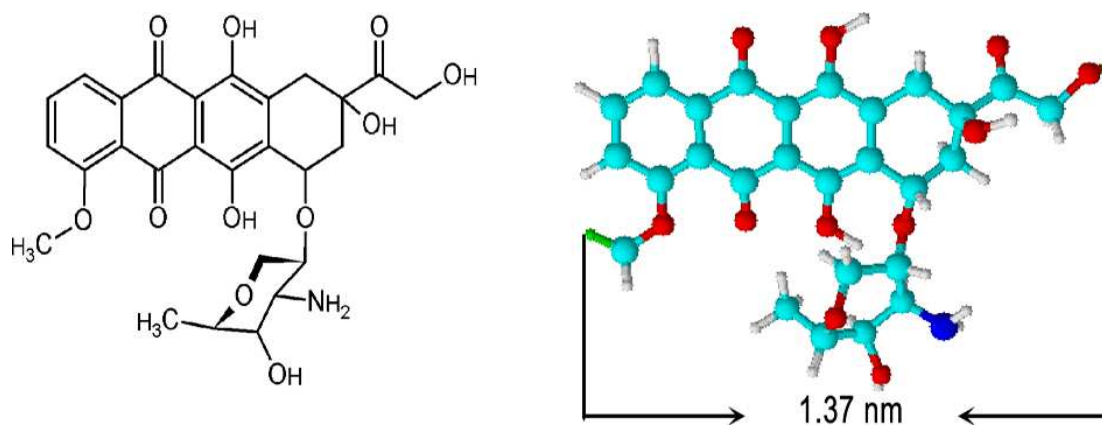

Figure S1. Molecular formula (left) and model (right) of DOX.

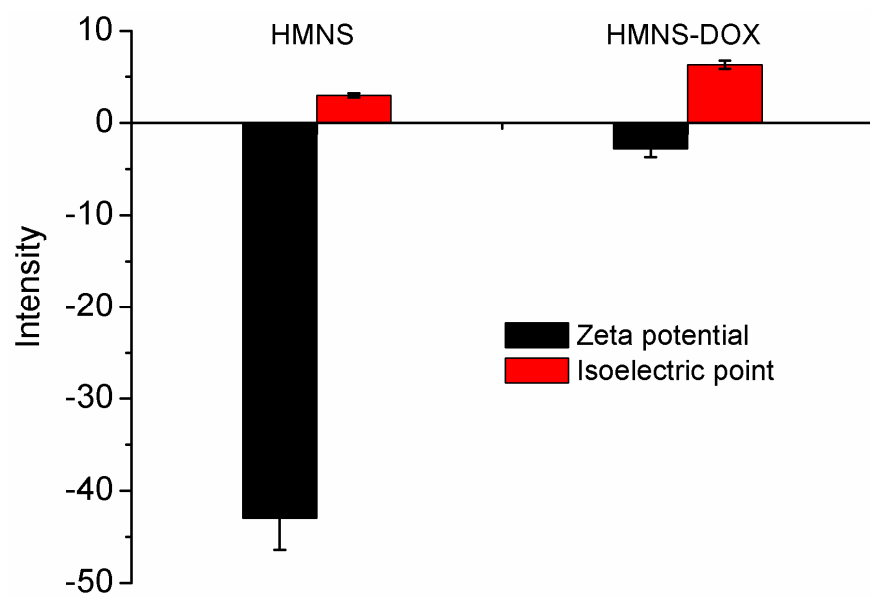

Figure S2. Zeta potentials and isoelectric points of HMNS and HMNS-DOX.

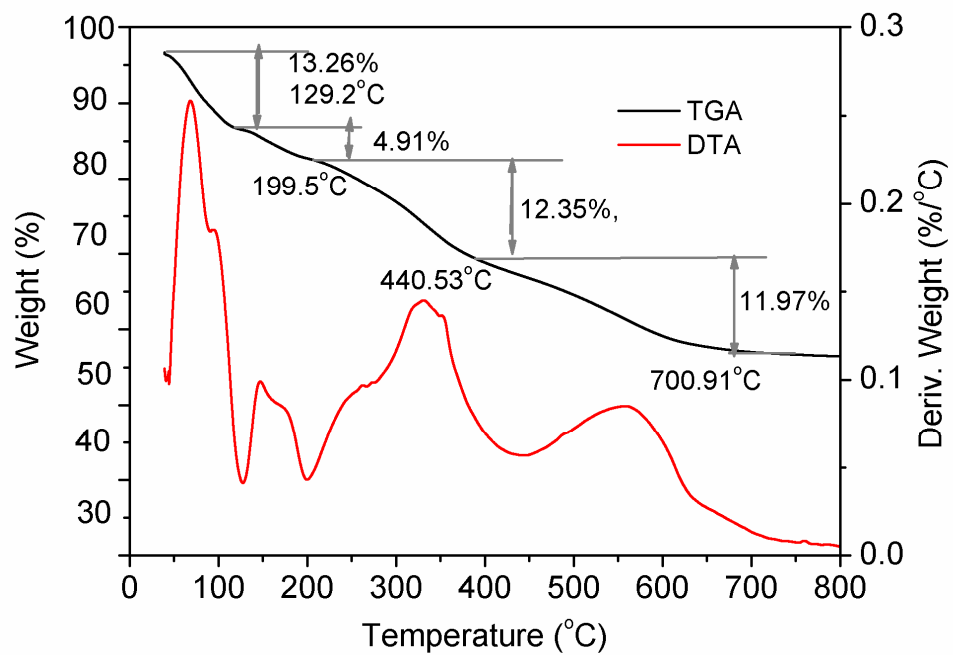

Figure S3. TGA (black line) and DTA (red line) curves of HMNS.

Mass% of PEI: 29.23% , molecular weight of PEI: 10000

Amount of amino group per PEI chain: 82

Mass% of silica NP: 70.07%, diameter of HMNS: 105 nm,

HMNS density: 0.21 g/mL

Amount of amino group:

$$\begin{aligned}n_{\text{NH}_2} &= (0.2923/10000) \times 6.02 \times 10^{23} \times 82 \\ &= 1.442 \times 10^{21}\end{aligned}$$

Mass of each silica NP:

$$\begin{aligned}m &= \rho V = 4/3 \times \rho \pi r^3 = 4/3 \times 0.21 \times 3.14 \times (5.25 \times 10^{-6})^3 \\ &= 1.27 \times 10^{-16} \text{ g/NP}\end{aligned}$$

Amount of silica NP:

$$n_{\text{si}} = 0.7007 / (1.27 \times 10^{-16}) = 5.51 \times 10^{15}$$

Therefore, amount of amino group per silica NP:

$$N = 1.442 \times 10^{21} / (5.51 \times 10^{15}) = 2.61 \times 10^5$$

Figure S4. Theoretical determinations of Gd-loadings on each PHMNS.
